# Supplementary material for: The Impact of Globalization on the Forest Products Industry
Source: publisher site journal article supplement (doi:10.18632/aging.202376), 2007-01-01
Supplement: Supplementary file [file aging-v13i1-202376-supplementary-material-SD1.pdf]

SUPPLEMENTARY FIGURE

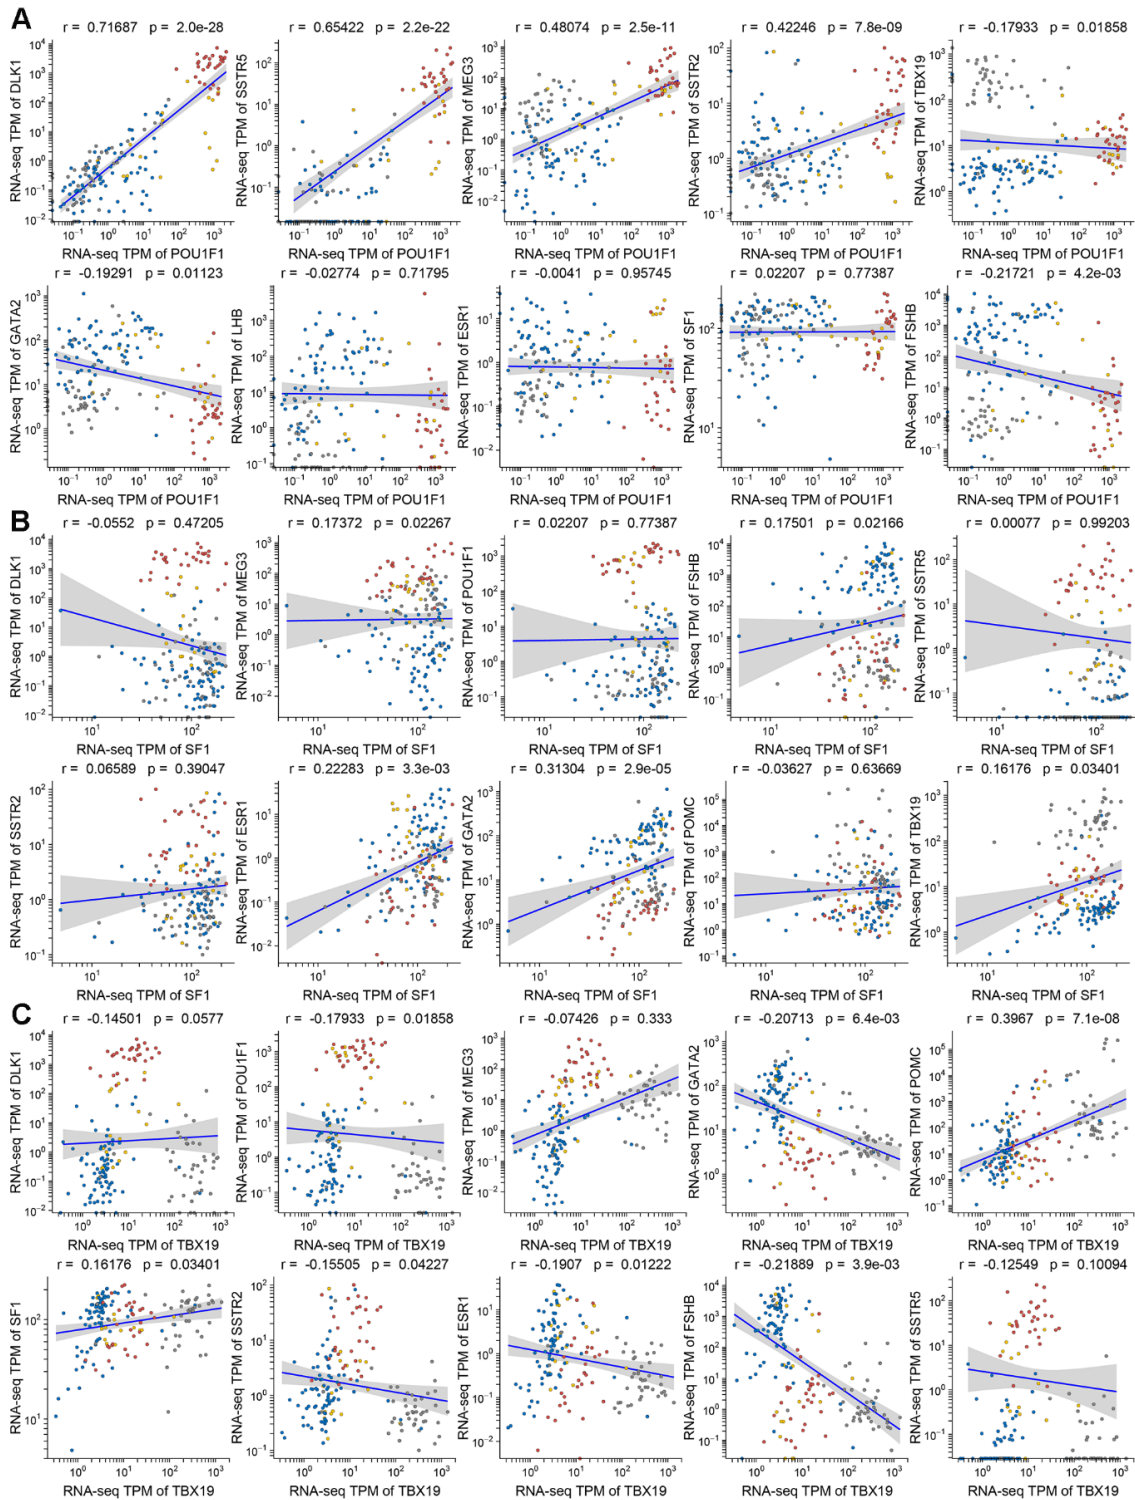

**Supplementary Figure 1. DLK1, POU1F1, TBX19 can distinguish somatotroph, lactotroph, gonadotroph, and corticotroph PitNETs distinctly and form the subtypes to aggregation clusters. (A)** The clustering effects with the base of POU1F1 and DLK1 can distinguish the subtypes of PitNETs, especially the somatotroph subtype. **(B)** The clustering effects with the base of SF1 and ESR1 are not clear enough to distinguish the subtypes of PitNETs. **(C)** The clustering effects with the base of TBX19 and DLK1 can distinguish the subtypes of PitNETs, especially the gonadotroph and corticotroph subtypes. Red: somatotroph; Yellow: lactotroph; Blue: gonadotroph; Gray: corticotroph.
